# Supplementary material for: On the weakly C–H⋯π hydrogen bonded complexes of sevoflurane and benzene
Source: Royal Society of Chemistry journal article supplement (doi:10.1039/c1cp20693a), 2011-01-01
Supplement: c1cp20693a.pdf [file c1cp20693a.pdf]

## On the weakly C-H... $\pi$ hydrogen bonded complexes of sevoflurane and benzene

J.J. Dom, B.J. van der Veken, B. Michielsens, S. Jacobs, Zhifeng Xue, S. Hesse, H.-M. Lortz, M.A. Suhm and W.A. Herrebout

### Supplementary Information

**Figure S1** Van 't Hoff plot for the isopropyl-bonded complex of sevoflurane and benzene, observed in liquid xenon, obtained by using the band areas of the  $682\text{ cm}^{-1}$ ,  $1497\text{ cm}^{-1}$  and  $1520\text{ cm}^{-1}$  bands as a measurement for  $I_{\text{compl}}$ ,  $I_{\text{sevo}}$  and  $I_{\text{benz}}$ . for a solution in liquid xenon with mole fractions  $2.5 \times 10^{-2}$  for sevoflurane and  $5.0 \times 10^{-3}$  for benzene (a),  $9.0 \times 10^{-4}$  for benzene (b).

**Figure S2** Scatter plots of the intensity of the isopropyl-bonded complex in liquid xenon of sevoflurane and benzene,  $I_{\text{compl}}$ , of a typical complex band versus the product of the monomers sevoflurane and benzene,  $(I_{\text{sevo}})^n \times (I_{\text{benz}})^m$  of appropriate powers of the intensities of monomer sevoflurane and monomer benzene : ( top-left )  $n=1, m=1$ ; ( top-right )  $n=1, m=3$ ; ( bottom-left )  $n=1, m=2$ , and ( bottom-right )  $n=2, m=1$ .

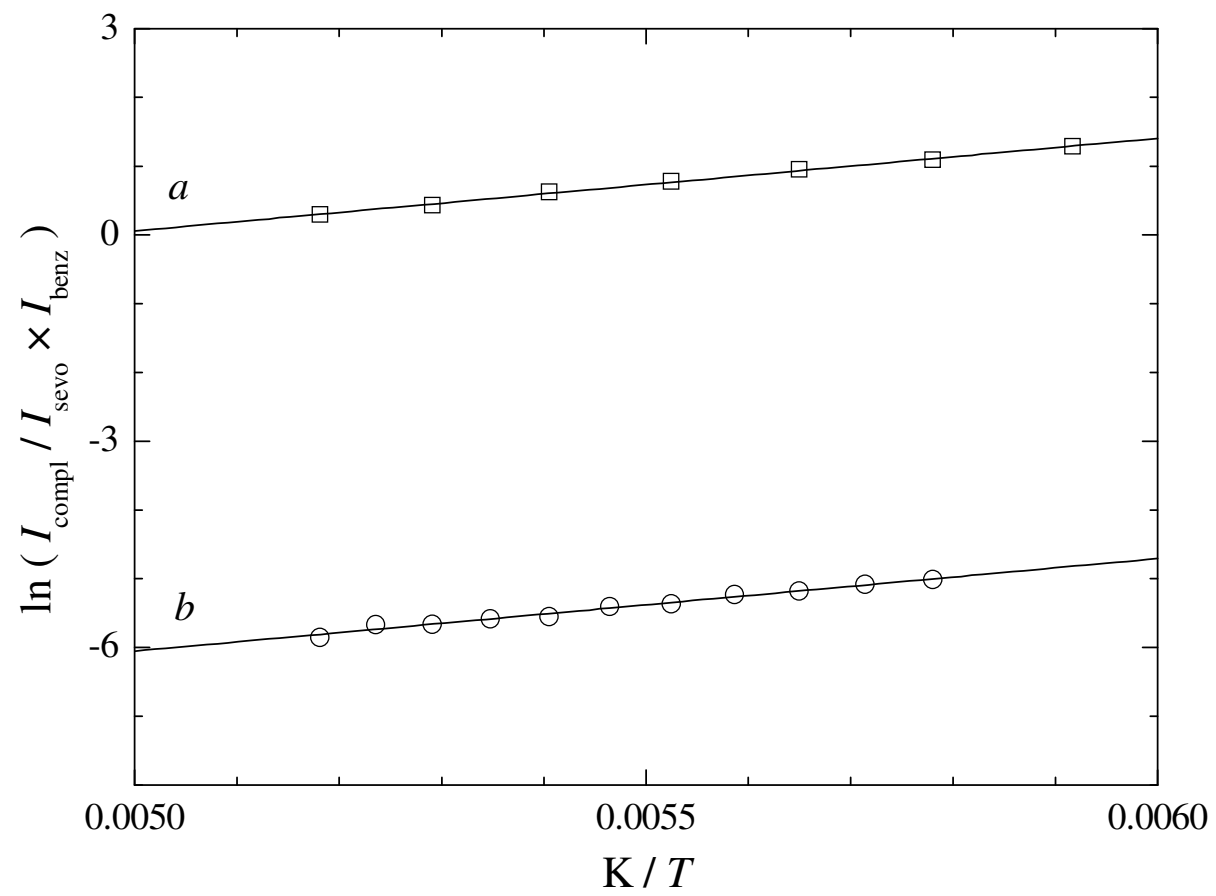

Figure S1

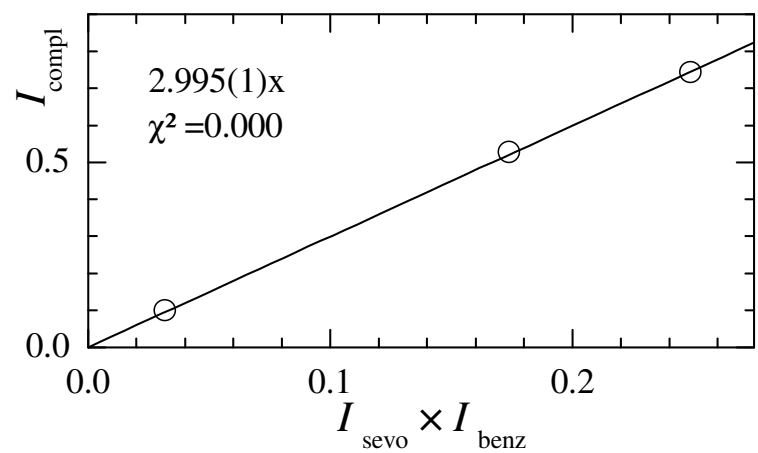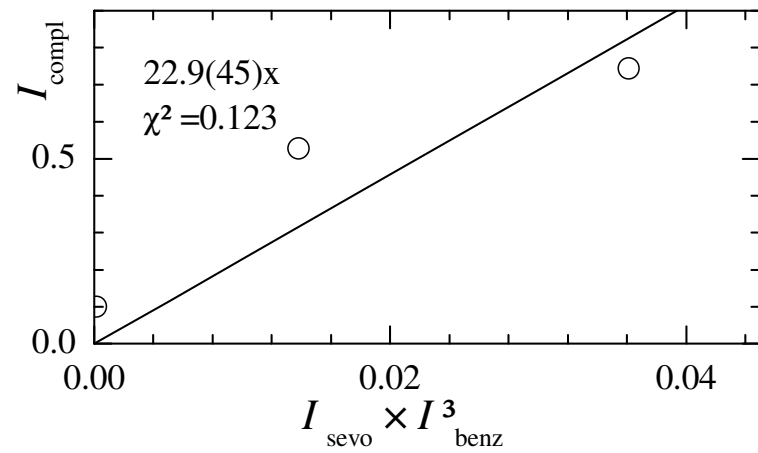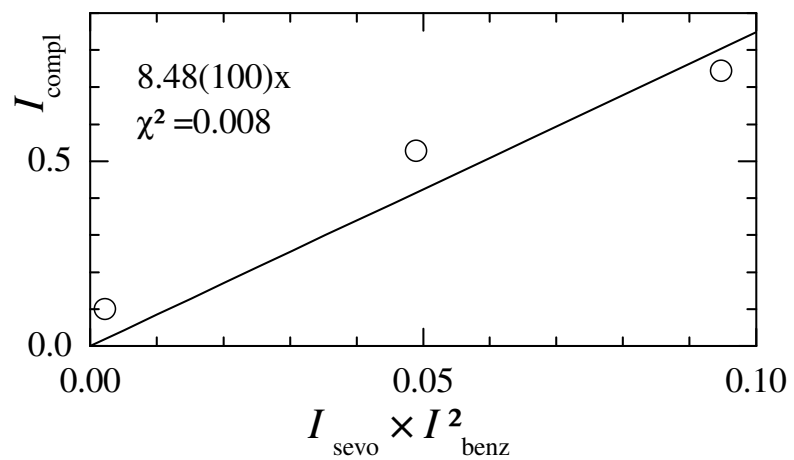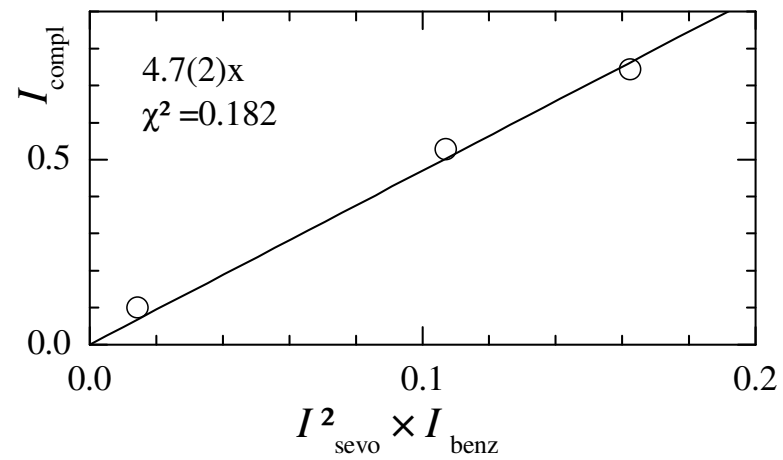

Figure S2

**Table S1** Characteristic frequencies  $\nu$ , in  $\text{cm}^{-1}$ , and vibrational assignments for jet expansions of sevoflurane and for solutions in liquid xenon at 173 K, in comparison with harmonic MP2/cc-pVDZ vibrational frequencies, in  $\text{cm}^{-1}$ , and infrared intensities *Int*, in  $\text{km mol}^{-1}$ , for the three conformers of sevoflurane, SEV1, SEV2 and SEV3.

| Assignment | Experimental frequencies |                |           |              | SEV1        |            | SEV2        |            | SEV3        |            |
|------------|--------------------------|----------------|-----------|--------------|-------------|------------|-------------|------------|-------------|------------|
|            | IR<br>(LXe)              | Raman<br>(LXe) | IR<br>jet | Raman<br>jet | MP2/cc-pvdz |            | MP2/cc-pvdz |            | MP2/cc-pvdz |            |
|            | $\nu$                    | $\nu$          | $\nu$     | $\nu$        | $\nu$       | <i>Int</i> | $\nu$       | <i>Int</i> | $\nu$       | <i>Int</i> |
| $\nu_1$    | 3021                     | 3021           | 3032      | 3031         | 3220.2      | 25.0       | 3234.2      | 17.3       | 3144.9      | 49.4       |
| $\nu_2$    | 2956                     | 2956           | 2968      | 2966         | 3143.0      | 2.2        | 3157.4      | 2.5        | 3105.3      | 8.8        |
| $\nu_3$    | 2929                     | 2929           | 2939      | 2938         | 3119.5      | 42.3       | 3149.5      | 36.0       | 3064.6      | 40.2       |
| $\nu_4$    | 1497.7                   | 1496.9         | -         | -            | 1538.2      | 2.7        | 1532.8      | 1.8        | 1553.0      | 2.9        |
| $\nu_5$    | 1415.9                   | 1415.9         | -         | 1414.3       | 1465.3      | 21.6       | 1475.4      | 40.5       | 1495.4      | 53.7       |
| $\nu_6$    | 1380.5                   | -              | -         | -            | 1438.3      | 134.8      | 1423.4      | 155.5      | 1429.3      | 146.9      |
| $\nu_7$    | 1370.0                   | 1370.3         | -         | 1370.9       | 1416.4      | 55.6       | 1407.8      | 34.0       | 1423.5      | 22.5       |
| $\nu_8$    | 1299.7                   | 1297.8         | -         | 1302.0       | 1348.9      | 329.8      | 1354.2      | 216.1      | 1354.4      | 353.6      |
| $\nu_9$    | 1291.6                   | -              | -         | 1290.3       | 1321.5      | 32.4       | 1331.2      | 43.0       | 1325.0      | 43.9       |
| $\nu_{10}$ | 1280.1                   | 1279.3         | -         | 1278.1       | 1311.1      | 22.4       | 1303.3      | 77.1       | 1283.8      | 72.8       |
| $\nu_{11}$ | 1270.3                   | -              | -         | 1270.1       | 1283.2      | 458.2      | 1292.8      | 293.6      | 1279.3      | 472.4      |
| $\nu_{12}$ | 1233.0                   | -              | -         | 1234.9       | 1257.5      | 215.5      | 1256.8      | 279.6      | 1253.6      | 148.2      |
| $\nu_{13}$ | 1213.7                   | 1212.1         | -         | 1212.5       | 1215.2      | 50.1       | 1223.5      | 47.8       | 1214.1      | 20.6       |

|                 |        |        |        |        |        |       |        |       |        |       |
|-----------------|--------|--------|--------|--------|--------|-------|--------|-------|--------|-------|
| V <sub>14</sub> | 1182.9 | -      | -      | 1182.5 | 1211.1 | 101.0 | 1206.2 | 167.2 | 1192.1 | 100.2 |
| V <sub>15</sub> | 1130.4 | 1129.7 | -      | 1130.2 | 1166.0 | 171.9 | 1166.8 | 142.9 | 1179.1 | 18.7  |
| V <sub>16</sub> | 1111.5 | 1110.7 | -      | 1111.5 | 1145.3 | 173.4 | 1146.8 | 127.5 | 1173.3 | 268.8 |
| V <sub>17</sub> | 1032.2 | 1031.3 | 1038.5 | 1035.4 | 1091.5 | 128.8 | 1099.2 | 180.5 | 1143.2 | 178.0 |
| V <sub>18</sub> | 1021.6 | 1020.0 | 1027.9 | 1026.9 | 1060.8 | 27.0  | 1016.7 | 59.9  | 1103.6 | 74.9  |
| V <sub>19</sub> | 905.3  | 906.0  | 910.6  |        | 928.3  | 50.3  | 917.3  | 42.2  | 926.7  | 53.5  |
| V <sub>20</sub> | 879.1  | 879.9  | 882.8  |        | 902.1  | 20.2  | 878.5  | 21.0  | 901.0  | 21.5  |
| V <sub>21</sub> | 742.6  | 742.5  | 744.8  | 743.3  | 749.3  | 7.4   | 757.0  | 8.6   | 746.7  | 8.8   |
| V <sub>22</sub> | 690.9  | 690.3  | 692.3  | 690.5  | 697.0  | 49.4  | 697.8  | 49.5  | 696.9  | 46.1  |
| V <sub>23</sub> | -      | 602.8  | 603.4  | 603.0  | 611.0  | 6.7   | 619.4  | 0.6   | 664.2  | 10.1  |
| V <sub>24</sub> | 567.4  | 566.2  | -      | 566.2  | 582.9  | 5.8   | 566.3  | 3.7   | 555.4  | 1.6   |
| V <sub>25</sub> | 548.5  | -      | -      | -      | 556.1  | 2.0   | 553.6  | 1.0   | 545.0  | 6.8   |
| V <sub>26</sub> | 537.2  | 536.6  | -      | 536.7  | 542.5  | 3.6   | 540.9  | 5.5   | 542.1  | 3.3   |
| V <sub>27</sub> | 523.3  | -      | -      | 522.2  | 526.3  | 11.5  | 524.0  | 10.1  | 516.4  | 4.2   |
| V <sub>28</sub> | 444.1  | 442.9  | -      | 443.5  | 452.8  | 2.2   | 479.5  | 4.1   | 358.0  | 0.1   |
| V <sub>29</sub> | 358.9  | 358.9  | -      | 358.9  | 366.9  | 4.7   | 334.2  | 0.4   | 344.2  | 0.2   |
| V <sub>30</sub> | 329.3  | 328.8  | -      | 327.1  | 336.2  | 1.3   | 331.6  | 2.3   | 331.8  | 0.4   |
| V <sub>31</sub> | 298.3  | 298.2  | -      | 298.4  | 297.9  | 1.9   | 305.5  | 3.1   | 297.6  | 0.6   |
| V <sub>32</sub> | 294.4  | 294.6  | -      | 293.5  | 295.6  | 1.7   | 293.6  | 0.5   | 292.7  | 1.8   |
| V <sub>33</sub> | 224.3  | 224.0  | -      | 219.5  | 225.1  | 2.0   | 220.8  | 1.2   | 253.1  | 2.2   |
| V <sub>34</sub> | 193.8  | 193.2  | -      | -      | 191.2  | 0.3   | 216.7  | 7.1   | 161.1  | 1.9   |

|                 |       |   |   |   |       |     |       |     |       |     |
|-----------------|-------|---|---|---|-------|-----|-------|-----|-------|-----|
| V <sub>35</sub> | 161.7 | - | - | - | 166.2 | 4.4 | 167.7 | 1.9 | 153.1 | 3.2 |
| V <sub>36</sub> | 106.4 | - | - | - | 111.4 | 4.5 | 126.7 | 3.4 | 71.4  | 0.2 |
| V <sub>37</sub> | 71.8  | - | - | - | 70.7  | 0.5 | 98.4  | 0.4 | 53.6  | 6.3 |
| V <sub>38</sub> | 54.7  | - | - | - | 54.8  | 1.1 | 81.7  | 2.6 | 45.6  | 1.5 |
| V <sub>39</sub> | -     | - | - | - | 31.0  | 0.0 | 33.3  | 0.2 | 22.8  | 1.7 |

---

**Table S2** MP2/cc-pvdz infrared harmonic vibrational frequencies  $\nu$ , in  $\text{cm}^{-1}$ , intensities  $Int$ , in  $\text{km mol}^{-1}$  and complexation shifts  $\Delta\nu$ , in  $\text{cm}^{-1}$ , for sevoflurane, benzene and the complexes of sevoflurane with benzene

| Sevoflurane |            | monomer |       | isopropyl-bonded complex |       |             | fluoromethyl-bonded complex |       |             |
|-------------|------------|---------|-------|--------------------------|-------|-------------|-----------------------------|-------|-------------|
| symmetry    | assignment | $\nu$   | $Int$ | $\nu$                    | $Int$ | $\Delta\nu$ | $\nu$                       | $Int$ | $\Delta\nu$ |
| A           | $\nu_1$    | 3220.2  | 25.0  | 3211.1                   | 34.4  | -9.1        | 3237.0                      | 2.1   | 16.8        |
|             | $\nu_2$    | 3143.0  | 2.2   | 3137.5                   | 4.9   | -5.5        | 3141                        | 2.4   | -2.0        |
|             | $\nu_3$    | 3119.5  | 42.3  | 3111.1                   | 34.4  | -8.4        | 3125.8                      | 32.5  | 6.3         |
|             | $\nu_4$    | 1538.2  | 2.7   | 1532.1                   | 0.3   | -6.1        | 1533.6                      | 2.1   | -4.6        |
|             | $\nu_5$    | 1465.3  | 21.6  | 1465.4                   | 20.4  | 0.1         | 1464.0                      | 22.4  | -1.3        |
|             | $\nu_6$    | 1438.3  | 134.8 | 1436.7                   | 100.2 | -1.6        | 1438.2                      | 132.7 | -0.1        |
|             | $\nu_7$    | 1416.4  | 55.6  | 1420.0                   | 41.9  | 3.6         | 1415.0                      | 47.8  | -1.4        |
|             | $\nu_8$    | 1348.9  | 329.8 | 1342.7                   | 384.6 | -6.2        | 1346.3                      | 297.2 | -2.6        |
|             | $\nu_9$    | 1321.5  | 32.4  | 1319.1                   | 16.7  | -2.4        | 1320.3                      | 26.3  | -1.2        |
|             | $\nu_{10}$ | 1311.1  | 22.4  | 1311.6                   | 55.6  | 0.5         | 1310.6                      | 23.9  | -0.5        |
|             | $\nu_{11}$ | 1283.2  | 458.2 | 1282.8                   | 371.2 | -0.4        | 1282.6                      | 465.5 | -0.6        |
|             | $\nu_{12}$ | 1257.5  | 215.5 | 1254.7                   | 194.0 | -2.8        | 1255.7                      | 244.1 | -1.8        |
|             | $\nu_{13}$ | 1215.2  | 50.1  | 1216.0                   | 24.2  | 0.8         | 1213.3                      | 38.1  | -1.9        |
|             | $\nu_{14}$ | 1211.1  | 101.0 | 1209.8                   | 107.4 | -1.3        | 1205.9                      | 119.3 | -5.2        |
|             | $\nu_{15}$ | 1166.0  | 171.9 | 1170.6                   | 140.1 | 4.6         | 1164.2                      | 0.7   | -1.8        |
|             | $\nu_{16}$ | 1145.3  | 173.4 | 1142.4                   | 145.6 | -2.9        | 1144.2                      | 157.3 | -1.1        |
|             | $\nu_{17}$ | 1091.5  | 128.8 | 1093.1                   | 107.5 | 1.6         | 1084.6                      | 129.0 | -6.9        |

|                 |        |      |        |      |      |        |      |      |
|-----------------|--------|------|--------|------|------|--------|------|------|
| v <sub>18</sub> | 1060.8 | 27.0 | 1056.4 | 20.2 | -4.4 | 1059.2 | 28.8 | -1.6 |
| v <sub>19</sub> | 928.3  | 50.3 | 926.2  | 42.3 | -2.1 | 927.2  | 47.7 | -1.1 |
| v <sub>20</sub> | 902.1  | 20.2 | 902.0  | 25.5 | -0.1 | 901.1  | 18.5 | -1.0 |
| v <sub>21</sub> | 749.3  | 7.4  | 748.8  | 8.3  | -0.5 | 749.0  | 7.4  | -0.3 |
| v <sub>22</sub> | 697.0  | 49.4 | 696.0  | 42.0 | -1.0 | 696.2  | 40.7 | -0.8 |
| v <sub>23</sub> | 611.0  | 6.7  | 612.2  | 5.7  | 1.2  | 610.8  | 5.9  | -0.2 |
| v <sub>24</sub> | 582.9  | 5.8  | 578.0  | 5.7  | -4.9 | 583.0  | 7.7  | 0.1  |
| v <sub>25</sub> | 556.1  | 2.0  | 555.6  | 2.6  | -0.5 | 556.0  | 2.1  | -0.1 |
| v <sub>26</sub> | 542.5  | 3.6  | 542.3  | 2.4  | -0.2 | 542.2  | 3.5  | -0.3 |
| v <sub>27</sub> | 526.3  | 11.5 | 528.2  | 13.5 | 1.9  | 526.3  | 10.8 | 0.0  |
| v <sub>28</sub> | 452.8  | 2.2  | 450.7  | 1.4  | -2.1 | 453.5  | 2.5  | 0.7  |
| v <sub>29</sub> | 366.9  | 4.7  | 368.4  | 4.5  | 1.5  | 367.5  | 3.5  | -0.6 |
| v <sub>30</sub> | 336.2  | 1.3  | 335.2  | 1.2  | -1.0 | 336.1  | 1.1  | -0.1 |
| v <sub>31</sub> | 297.9  | 1.9  | 302.6  | 2.7  | 4.8  | 299.2  | 1.9  | 1.3  |
| v <sub>32</sub> | 295.6  | 1.7  | 297.2  | 0.2  | 1.5  | 295.7  | 1.0  | 0.1  |
| v <sub>33</sub> | 225.1  | 2.0  | 222.8  | 1.8  | -2.3 | 225.3  | 1.6  | 0.2  |
| v <sub>34</sub> | 191.2  | 0.3  | 193.3  | 0.3  | 2.1  | 194.6  | 0.3  | 3.4  |
| v <sub>35</sub> | 166.2  | 4.4  | 161.4  | 3.0  | -4.8 | 168.6  | 4.2  | 2.4  |
| v <sub>36</sub> | 111.4  | 4.5  | 106.0  | 6.6  | -5.4 | 117.0  | 3.3  | 5.6  |
| v <sub>37</sub> | 70.7   | 0.5  | 76.7   | 0.7  | 6.0  | 80.7   | 0.3  | 10.0 |
| v <sub>38</sub> | 54.8   | 1.1  | 57.2   | 0.2  | 2.4  | 62.5   | 0.8  | 7.7  |



|                 |                 |        |      |        |       |      |        |       |      |  |
|-----------------|-----------------|--------|------|--------|-------|------|--------|-------|------|--|
|                 | v <sub>39</sub> | 31.0   | 0.0  | 38.4   | 0.1   | 7.4  | 30.5   | 0.0   | -0.5 |  |
| <b>Benzene</b>  |                 |        |      |        |       |      |        |       |      |  |
| A <sub>1g</sub> | v <sub>1</sub>  | 3246.8 | 0.0  | 3249.0 | 0.2   | 2.2  | 3247.9 | 0.2   | 1.1  |  |
|                 | v <sub>2</sub>  | 1017.0 | 0.0  | 1015.9 | 0.2   | -1.1 | 1015.7 | 0.3   | -1.3 |  |
| A <sub>2g</sub> | v <sub>3</sub>  | 1358.9 | 0.0  | 1358.6 | 0.0   | -0.3 | 1358.8 | 0.0   | -0.1 |  |
|                 | v <sub>4</sub>  | 686.0  | 90.9 | 692.5  | 108.5 | 6.5  | 690.2  | 111.7 | 4.2  |  |
| B <sub>1u</sub> | v <sub>5</sub>  | 3209.4 | 0.0  | 3212.0 | 0.8   | 2.6  | 3210.9 | 0.1   | 1.5  |  |
|                 | v <sub>6</sub>  | 1007.0 | 0.0  | 1006.7 | 0.0   | -0.4 | 1006.6 | 0.0   | -0.4 |  |
| B <sub>2g</sub> | v <sub>7</sub>  | 961.9  | 0.0  | 962.5  | 0.0   | 0.5  | 962.2  | 0.0   | 0.3  |  |
|                 | v <sub>8</sub>  | 633.9  | 0.0  | 625.0  | 0.0   | -8.9 | 627.0  | 0.0   | -6.9 |  |
| B <sub>2u</sub> | v <sub>9</sub>  | 1472.4 | 0.0  | 1473.6 | 0.0   | 1.3  | 1473.0 | 0.0   | 0.6  |  |
|                 | v <sub>10</sub> | 1163.4 | 0.0  | 1164.3 | 0.0   | 1.0  | 1161.3 | 144.1 | -2.1 |  |
| E <sub>1g</sub> | v <sub>11</sub> | 858.9  | 0.0  | 864.5  | 0.6   | 5.6  | 863.1  | 0.2   | 4.2  |  |
|                 |                 | 858.9  | 0.0  | 863.6  | 0.7   | 4.7  | 862.5  | 0.2   | 3.6  |  |
| E <sub>1u</sub> | v <sub>12</sub> | 3236.9 | 29.7 | 3240.9 | 16.1  | 4.0  | 3238.6 | 20.8  | 1.7  |  |
|                 |                 | 3236.9 | 29.7 | 3237.7 | 18.5  | 0.8  | 3237.6 | 29.7  | 0.7  |  |
|                 | v <sub>13</sub> | 1505.0 | 7.6  | 1503.9 | 9.3   | -1.1 | 1504.1 | 9.3   | -0.9 |  |
|                 |                 | 1505.0 | 7.6  | 1503.7 | 8.2   | -1.3 | 1504.0 | 8.8   | -1.0 |  |
|                 | v <sub>14</sub> | 1061.3 | 4.4  | 1061.1 | 4.7   | -0.2 | 1061.1 | 3.5   | -0.2 |  |
|                 |                 | 1061.3 | 4.4  | 1060.6 | 2.9   | -0.7 | 1060.7 | 3.6   | -0.6 |  |
| E <sub>2g</sub> | v <sub>15</sub> | 3220.4 | 0.0  | 3224.6 | 0.6   | 4.2  | 3223.0 | 0.3   | 2.6  |  |

|                 |                 |        |     |        |     |      |        |     |      |
|-----------------|-----------------|--------|-----|--------|-----|------|--------|-----|------|
|                 |                 | 3220.4 | 0.0 | 3222.3 | 0.0 | 1.9  | 3221.4 | 0.4 | 1.0  |
|                 | v <sub>16</sub> | 1649.7 | 0.0 | 1646.9 | 0.0 | -2.8 | 1647.3 | 0.0 | -2.4 |
|                 |                 | 1649.7 | 0.0 | 1646.5 | 0.0 | -3.2 | 1647.0 | 0.0 | -2.7 |
|                 | v <sub>17</sub> | 1190.7 | 0.0 | 1191.7 | 0.5 | 1.0  | 1191.4 | 0.1 | 0.7  |
|                 |                 | 1190.7 | 0.0 | 1190.5 | 0.3 | -0.2 | 1190.5 | 0.1 | -0.2 |
|                 | v <sub>18</sub> | 605.6  | 0.0 | 605.3  | 0.0 | -0.3 | 605.2  | 0.0 | -0.4 |
|                 |                 | 605.6  | 0.0 | 604.8  | 0.0 | -0.8 | 604.8  | 0.0 | -0.8 |
| E <sub>2u</sub> | v <sub>19</sub> | 953.7  | 0.0 | 957.4  | 0.0 | 3.7  | 956.1  | 0.1 | 2.4  |
|                 |                 | 953.7  | 0.0 | 956.2  | 0.0 | 2.5  | 955.8  | 0.0 | 2.1  |
|                 | v <sub>20</sub> | 400.9  | 0.0 | 399.8  | 0.0 | -1.1 | 400.3  | 0.0 | -0.6 |
|                 |                 | 400.9  | 0.0 | 399.0  | 0.0 | -1.9 | 399.6  | 0.0 | -1.3 |
|                 | vdW             |        |     |        |     |      |        |     |      |
|                 | v <sub>1</sub>  |        |     | 52.7   | 0.2 |      | 52.7   | 0.2 |      |
|                 | v <sub>2</sub>  |        |     | 50.9   | 0.9 |      | 50.0   | 0.2 |      |
|                 | v <sub>3</sub>  |        |     | 45.0   | 0.1 |      | 43.0   | 0.1 |      |
|                 | v <sub>4</sub>  |        |     | 34.3   | 0.1 |      | 19.1   | 0.1 |      |
|                 | v <sub>5</sub>  |        |     | 21.8   | 0.3 |      | 11.8   | 0.2 |      |
|                 | v <sub>6</sub>  |        |     | 7.9    | 0.0 |      | 7.8    | 0.0 |      |

**Table S3** MP2/aug-cc-pvdz infrared harmonic vibrational frequencies  $\nu$ , in  $\text{cm}^{-1}$ , intensities  $Int$ , in  $\text{km mol}^{-1}$  and complexation shifts  $\Delta\nu$ , in  $\text{cm}^{-1}$ , for sevoflurane, benzene and the complexes of sevoflurane with benzene

| Sevoflurane |            | monomer |       | isopropyl-bonded complex |       |             | fluoromethyl-bonded complex |       |             |
|-------------|------------|---------|-------|--------------------------|-------|-------------|-----------------------------|-------|-------------|
|             |            | $\nu$   | $Int$ | $\nu$                    | $Int$ | $\Delta\nu$ | $\nu$                       | $Int$ | $\Delta\nu$ |
| A           | $\nu_1$    | 3225.5  | 10.2  | 3216.3                   | 15.7  | -9.1        | 3231.9                      | 4.1   | 6.4         |
|             | $\nu_2$    | 3120.8  | 15.7  | 3111.5                   | 15.2  | -9.3        | 3113.5                      | 7.9   | -7.3        |
|             | $\nu_3$    | 3116.2  | 16.1  | 3107.9                   | 26.7  | -8.3        | 3121.6                      | 14.7  | 5.4         |
|             | $\nu_4$    | 1524.4  | 0.7   | 1518.6                   | 0.8   | -5.8        | 1515.9                      | 0.7   | -8.5        |
|             | $\nu_5$    | 1431.1  | 8.8   | 1430.2                   | 7.9   | -1.0        | 1428.7                      | 10.8  | -2.4        |
|             | $\nu_6$    | 1413.9  | 86.0  | 1410.2                   | 55.9  | -3.6        | 1412.7                      | 87.5  | -1.2        |
|             | $\nu_7$    | 1392.1  | 56.1  | 1393.7                   | 45.3  | 1.6         | 1389.6                      | 46.3  | -2.5        |
|             | $\nu_8$    | 1311.8  | 191.1 | 1305.2                   | 173.5 | -6.6        | 1308.1                      | 162.6 | -3.7        |
|             | $\nu_9$    | 1293.1  | 20.2  | 1295.9                   | 100.3 | 2.8         | 1292.9                      | 16.4  | -0.2        |
|             | $\nu_{10}$ | 1281.3  | 42.6  | 1274.8                   | 54.4  | -6.5        | 1278.5                      | 40.5  | -2.8        |
|             | $\nu_{11}$ | 1219.3  | 522.4 | 1216.1                   | 401.6 | -3.2        | 1218.1                      | 510.8 | -1.2        |
|             | $\nu_{12}$ | 1207.6  | 245.8 | 1202.3                   | 231.8 | -5.3        | 1204.7                      | 284.4 | -2.9        |
|             | $\nu_{13}$ | 1188.4  | 64.2  | 1186.1                   | 53.2  | -2.3        | 1182.5                      | 72.6  | -5.9        |
|             | $\nu_{14}$ | 1152.0  | 12.2  | 1149.9                   | 16.3  | -2.1        | 1149.7                      | 9.6   | -2.3        |
|             | $\nu_{15}$ | 1138.7  | 144.4 | 1142.1                   | 132.4 | 3.4         | 1133.8                      | 118.8 | -4.9        |
|             | $\nu_{16}$ | 1098.1  | 159.0 | 1092.7                   | 120.2 | -5.4        | 1095.9                      | 144.8 | -2.2        |
|             | $\nu_{17}$ | 1042.8  | 42.7  | 1039.3                   | 45.8  | -3.5        | 1039.0                      | 30.1  | -3.8        |

|                 |        |       |        |       |      |        |       |      |
|-----------------|--------|-------|--------|-------|------|--------|-------|------|
| v <sub>18</sub> | 1012.7 | 161.5 | 1006.7 | 124.2 | -5.9 | 1005.2 | 124.4 | -7.5 |
| v <sub>19</sub> | 906.1  | 56.7  | 902.9  | 45.7  | -3.2 | 904.7  | 53.5  | -1.4 |
| v <sub>20</sub> | 880.7  | 19.6  | 880.1  | 31.1  | -0.6 | 878.2  | 17.1  | -2.5 |
| v <sub>21</sub> | 726.1  | 5.7   | 725.0  | 7.8   | -1.1 | 725.6  | 5.7   | -0.5 |
| v <sub>22</sub> | 674.8  | 43.9  | 673.6  | 34.9  | -1.2 | 674.2  | 46.9  | -0.6 |
| v <sub>23</sub> | 592.2  | 9.2   | 593.8  | 7.9   | 1.6  | 592.4  | 7.3   | 0.2  |
| v <sub>24</sub> | 559.1  | 4.5   | 551.2  | 4.7   | -7.9 | 558.4  | 6.6   | -0.7 |
| v <sub>25</sub> | 535.0  | 1.7   | 533.6  | 2.3   | -1.3 | 534.8  | 2.0   | -0.2 |
| v <sub>26</sub> | 519.5  | 3.0   | 519.4  | 1.9   | -0.2 | 519.2  | 2.9   | -0.3 |
| v <sub>27</sub> | 504.9  | 9.9   | 507.4  | 12.2  | 2.4  | 504.9  | 8.9   | 0.0  |
| v <sub>28</sub> | 439.1  | 1.8   | 437.3  | 0.8   | -1.8 | 440.1  | 2.0   | 1.0  |
| v <sub>29</sub> | 361.4  | 5.2   | 363.7  | 4.8   | 2.3  | 362.8  | 3.7   | 1.4  |
| v <sub>30</sub> | 326.8  | 1.4   | 325.7  | 1.3   | -1.0 | 326.6  | 1.1   | -0.2 |
| v <sub>31</sub> | 292.2  | 2.5   | 297.9  | 2.3   | 5.6  | 294.9  | 2.0   | 4.7  |
| v <sub>32</sub> | 288.7  | 0.8   | 290.4  | 0.2   | 1.8  | 288.6  | 0.5   | -0.1 |
| v <sub>33</sub> | 220.3  | 1.9   | 220.1  | 1.8   | -0.2 | 220.9  | 1.5   | 0.6  |
| v <sub>34</sub> | 190.6  | 0.2   | 194.8  | 0.3   | 4.2  | 196.4  | 0.3   | 5.8  |
| v <sub>35</sub> | 163.1  | 3.9   | 160.0  | 2.9   | -3.1 | 166.3  | 3.6   | 3.2  |
| v <sub>36</sub> | 103.1  | 5.0   | 108.4  | 8.6   | 5.3  | 112.0  | 3.5   | 8.9  |
| v <sub>37</sub> | 69.4   | 0.9   | 81.2   | 0.8   | 11.7 | 87.3   | 0.5   | 17.9 |
| v <sub>38</sub> | 51.3   | 1.6   | 54.9   | 0.5   | 3.6  | 58.8   | 1.2   | 7.5  |

|                 |                 |        |       |        |       |      |        |       |      |
|-----------------|-----------------|--------|-------|--------|-------|------|--------|-------|------|
|                 | v <sub>39</sub> | 34.0   | 0.0   | 48.9   | 0.3   | 15.0 | 36.6   | 0.0   | 2.6  |
| <b>Benzene</b>  |                 |        |       |        |       |      |        |       |      |
| A <sub>1g</sub> | v <sub>1</sub>  | 3233.5 | 0.0   | 3235.7 | 0.3   | 2.2  | 3234.5 | 0.4   | 1.0  |
|                 | v <sub>2</sub>  | 1004.2 | 0.0   | 1003.2 | 0.8   | -1.1 | 1002.5 | 52.4  | -1.7 |
| A <sub>2g</sub> | v <sub>3</sub>  | 1324.0 | 0.0   | 1323.3 | 0.0   | -0.7 | 1323.6 | 0.0   | -0.4 |
|                 | v <sub>4</sub>  | 678.0  | 115.9 | 686.9  | 134.8 | 8.9  | 684.7  | 125.8 | 6.7  |
| B <sub>1u</sub> | v <sub>5</sub>  | 3196.2 | 0.0   | 3199.3 | 0.3   | 3.0  | 3197.9 | 0.1   | 1.7  |
|                 | v <sub>6</sub>  | 976.1  | 0.0   | 974.1  | 0.0   | -2.0 | 973.9  | 0.1   | -2.2 |
| B <sub>2g</sub> | v <sub>7</sub>  | 907.0  | 0.0   | 908.4  | 0.1   | 1.4  | 909.0  | 0.4   | 2.0  |
|                 | v <sub>8</sub>  | 576.9  | 0.0   | 570.2  | 0.0   | -6.7 | 571.9  | 0.0   | -5.0 |
| B <sub>2u</sub> | v <sub>9</sub>  | 1469.9 | 0.0   | 1475.7 | 0.0   | 5.8  | 1474.2 | 0.0   | 4.3  |
|                 | v <sub>10</sub> | 1155.9 | 0.0   | 1157.8 | 0.6   | 1.9  | 1157.2 | 0.3   | 1.3  |
| E <sub>1g</sub> | v <sub>11</sub> | 845.0  | 0.0   | 852.2  | 1.1   | 7.2  | 851.0  | 0.7   | 6.0  |
|                 |                 | 845.0  | 0.0   | 850.7  | 1.9   | 5.7  | 849.8  | 0.5   | 0.8  |
| E <sub>1u</sub> | v <sub>12</sub> | 3223.8 | 28.7  | 3227.9 | 12.8  | 4.1  | 3225.7 | 17.7  | 1.9  |
|                 |                 | 3223.8 | 28.7  | 3224.5 | 15.2  | 0.7  | 3223.8 | 17.9  | 0.0  |
|                 | v <sub>13</sub> | 1469.6 | 5.3   | 1468.6 | 7.2   | -1.1 | 1468.8 | 6.5   | -0.8 |
|                 |                 | 1469.6 | 5.3   | 1468.1 | 6.2   | -1.5 | 1468.6 | 7.1   | -1.0 |
|                 | v <sub>14</sub> | 1051.0 | 5.2   | 1050.5 | 4.3   | -0.5 | 1050.5 | 6.0   | -0.5 |
|                 |                 | 1051.0 | 5.2   | 1049.6 | 3.1   | -1.5 | 1050.0 | 3.7   | -1.0 |
| E <sub>2g</sub> | v <sub>15</sub> | 3207.5 | 0.0   | 3212.3 | 0.6   | 4.8  | 3210.5 | 0.8   | 3.0  |

|                 |                 |        |     |        |     |      |        |      |      |
|-----------------|-----------------|--------|-----|--------|-----|------|--------|------|------|
|                 |                 | 3207.5 | 0.0 | 3209.6 | 0.1 | 2.1  | 3207.9 | 0.4  | 0.4  |
|                 | v <sub>16</sub> | 1622.2 | 0.0 | 1618.6 | 0.0 | -3.7 | 1619.8 | 0.0  | -2.4 |
|                 |                 | 1622.2 | 0.0 | 1618.0 | 0.0 | -4.3 | 1619.2 | 0.0  | -3.0 |
|                 | v <sub>17</sub> | 1183.1 | 0.0 | 1183.9 | 2.5 | 0.8  | 1184.1 | 14.2 | 1.0  |
|                 |                 | 1183.1 | 0.0 | 1182.7 | 2.6 | -0.4 | 1182.8 | 0.3  | -0.3 |
|                 | v <sub>18</sub> | 596.9  | 0.0 | 595.4  | 0.0 | -1.5 | 595.4  | 0.0  | -1.5 |
|                 |                 | 596.9  | 0.0 | 594.7  | 0.1 | -2.2 | 594.9  | 0.0  | -2.0 |
| E <sub>2u</sub> | v <sub>19</sub> | 929.7  | 0.0 | 932.9  | 0.1 | 3.1  | 933.2  | 0.3  | 35   |
|                 |                 | 929.7  | 0.0 | 932.7  | 0.1 | 2.9  | 932.3  | 0.1  | 2.6  |
|                 | v <sub>20</sub> | 394.7  | 0.0 | 394.3  | 0.0 | -0.4 | 395.0  | 0.1  | 0.3  |
|                 |                 | 394.7  | 0.0 | 392.8  | 0.0 | -1.9 | 393.6  | 0.0  | -1.1 |
|                 | vdW             |        |     |        |     |      |        |      |      |
|                 | v <sub>1</sub>  |        |     | 70.7   | 0.2 |      | 67.4   | 0.4  |      |
|                 | v <sub>2</sub>  |        |     | 68.3   | 0.6 |      | 62.2   | 0.1  |      |
|                 | v <sub>3</sub>  |        |     | 62.5   | 0.2 |      | 51.4   | 0.2  |      |
|                 | v <sub>4</sub>  |        |     | 46.2   | 0.4 |      | 30.7   | 0.2  |      |
|                 | v <sub>5</sub>  |        |     | 30.8   | 0.2 |      | 17.5   | 0.2  |      |
|                 | v <sub>6</sub>  |        |     | 12.9   | 0.0 |      | 10.2   | 0.0  |      |
